# Supplementary material
Source: HighWire-hosted journal article supplement (https://diabetes.diabetesjournals.org/content/suppl/2007/10/03/db07-0516)

## Supplementary Figure 1

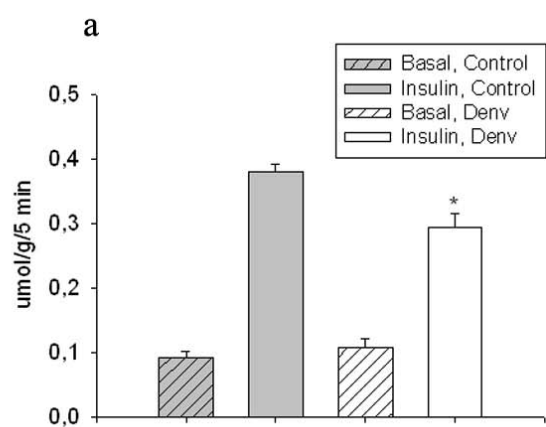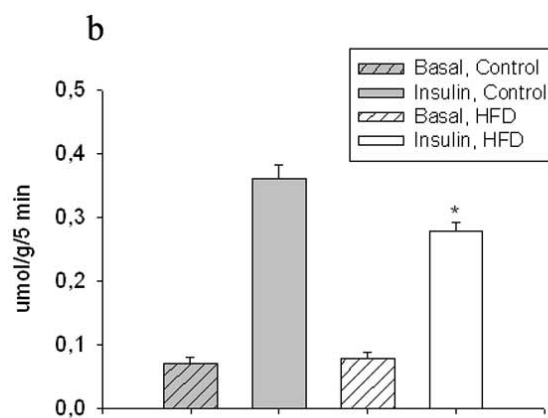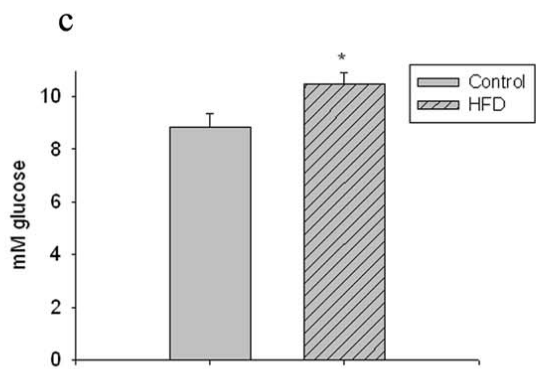

Supplement: db070516SupplementaryFigure.pdf [file db070516SupplementaryFigure.pdf]
